# Supplementary material
Source: PubMed Central journal article supplement (PMC6364588)
Supplement: rspb20182413supp1.pdf [file rspb20182413supp1.pdf]

# Supplementary Tables

**Table S1: General linear mixed models to analyse copepod behaviour in response to infection by parasites selected for or against host manipulation.** This table shows the outcome of two separate linear mixed models for predation suppression (i.e. host manipulation by not yet infective parasites) and predation enhancement (i.e. host manipulation by infective parasites). A model investigating both in combination is presented in Table 1 and discussed in the main manuscript. Initial model: response  $\sim 1 + (1 | \text{population})$ . Test statistics and p-values were obtained using likelihood ratio tests and are always for the comparison with the preceding (i.e. less complicated) model. N: 1231 copepods in 4 populations; Significant p values are highlighted in bold.

| <b>Predation suppression (df: 3)</b> |      |          |                   |
|--------------------------------------|------|----------|-------------------|
| Factor                               | df   | $\chi^2$ | p                 |
| + Generation                         | 4,1  | 19.11    | <b>&lt;0.0001</b> |
| + Infection                          | 5,1  | 209.84   | <b>&lt;0.0001</b> |
| + Selection line                     | 7,2  | 13.59    | <b>0.0011</b>     |
| + Infection: Generation              | 8,1  | 2.95     | 0.0859            |
| + Selection line: Generation         | 10,2 | 1.07     | 0.5867            |
| <b>Predation enhancement (df: 3)</b> |      |          |                   |
| Factor                               | df   | $\chi^2$ | p                 |
| + Generation                         | 4,1  | 2.45     | 0.1172            |
| + Infection                          | 5,1  | 25.88    | <b>&lt;0.0001</b> |
| + Selection line                     | 7,2  | 19.80    | <b>&lt;0.0001</b> |
| + Infection: Generation              | 8,1  | 8.43     | <b>0.0037</b>     |
| + Selection line: Generation         | 10,2 | 2.40     | 0.3007            |

**Table S2: Summary of the model containing all fixed effects and significant interactions (see table S1).** Infection was removed from these models since the information is also contained in selection line. Comparisons are with parasites from the control line.

|                             | <b>Predation suppression</b> | <b>Predation enhancement</b> |                      |          |
|-----------------------------|------------------------------|------------------------------|----------------------|----------|
| <b>Random effects</b>       |                              |                              |                      |          |
| Factor                      | Variance $\pm$ SD            |                              | Variance $\pm$ SD    |          |
| Replicate (intercept)       | 0.0008 $\pm$ 0.0281          |                              | 0.0009 $\pm$ 0.0293  |          |
| Residual                    | 0.0191 $\pm$ 0.1383          |                              | 0.0366 $\pm$ 0.1914  |          |
| <b>Fixed effects</b>        |                              |                              |                      |          |
| Factor                      | Estimate $\pm$ SE            | t- value                     | Estimate $\pm$ SE    | t- value |
| intercept                   | 0.2917 $\pm$ 0.0180          | 16.162                       | 0.5224 $\pm$ 0.0217  | 24.024   |
| Selection line (High)       | -0.0019 $\pm$ 0.0114         | -0.168                       | 0.0134 $\pm$ 0.0158  | 0.848    |
| Selection line (Low)        | 0.0305 $\pm$ 0.0115          | 2.657                        | -0.0430 $\pm$ 0.0159 | -2.707   |
| Selection line (Uninfected) | 0.1953 $\pm$ 0.0147          | 13.276                       | 0.0021 $\pm$ 0.0324  | 0.064    |
| Generation                  | 0.0193 $\pm$ 0.0040          | 4.789                        | 0.0300 $\pm$ 0.0143  | 2.101    |
| Infection: Generation       |                              |                              | -0.0448 $\pm$ 0.0155 | -2.891   |

**Table S3: Post hoc tests for selection on parasites for or against host manipulation.** Significant p values are highlighted in bold.

| Host manipulation                                                           |         |             |       |                  |             |       |                  |             |       |                  |             |       |                  |
|-----------------------------------------------------------------------------|---------|-------------|-------|------------------|-------------|-------|------------------|-------------|-------|------------------|-------------|-------|------------------|
| comparison                                                                  |         | F0          |       |                  | F1          |       |                  | F2          |       |                  | F3          |       |                  |
|                                                                             |         | coefficient | t     | p                |
| Uninfected                                                                  | Control | -0.256      | -5.28 | <b>&lt;0.001</b> | -0.145      | -3.59 | <b>0.002</b>     | -0.117      | -2.42 | 0.069            | -0.002      | -0.05 | 1                |
|                                                                             | High    | -0.223      | -4.55 | <b>&lt;0.001</b> | -0.185      | -5.40 | <b>&lt;0.001</b> | -0.137      | -3.24 | <b>0.006</b>     | -0.063      | -1.70 | 0.319            |
|                                                                             | Low     | -0.180      | -3.60 | <b>0.002</b>     | -0.114      | -3.29 | <b>0.005</b>     | -0.017      | -0.41 | 0.975            | 0.036       | 0.99  | 0.754            |
| Low                                                                         | Control | -0.076      | -1.77 | 0.289            | -0.030      | -0.96 | 0.764            | -0.100      | -2.92 | <b>0.017</b>     | -0.038      | -1.17 | 0.645            |
|                                                                             | High    | -0.043      | -0.98 | 0.761            | -0.071      | -3.01 | <b>0.013</b>     | -0.119      | -4.88 | <b>&lt;0.001</b> | -0.099      | -3.34 | <b>0.004</b>     |
| High                                                                        | Control | -0.034      | -0.80 | 0.853            | 0.041       | 1.30  | 0.555            | 0.020       | 0.58  | 0.934            | 0.061       | 1.84  | 0.253            |
| Predation suppression (day 6-8 post infection, not yet infective parasites) |         |             |       |                  |             |       |                  |             |       |                  |             |       |                  |
| comparison                                                                  |         | F0          |       |                  | F1          |       |                  | F2          |       |                  | F3          |       |                  |
|                                                                             |         | coefficient | t     | p                |
| Uninfected                                                                  | Control | 0.206       | 5.96  | <b>&lt;0.001</b> | 0.232       | 9.17  | <b>&lt;0.001</b> | 0.196       | 6.15  | <b>&lt;0.001</b> | 0.151       | 5.49  | <b>&lt;0.001</b> |
|                                                                             | High    | 0.195       | 5.60  | <b>&lt;0.001</b> | 0.225       | 10.41 | <b>&lt;0.001</b> | 0.219       | 7.91  | <b>&lt;0.001</b> | 0.172       | 6.66  | <b>&lt;0.001</b> |
|                                                                             | Low     | 0.197       | 5.52  | <b>&lt;0.001</b> | 0.189       | 8.65  | <b>&lt;0.001</b> | 0.165       | 5.93  | <b>&lt;0.001</b> | 0.158       | 6.25  | <b>&lt;0.001</b> |
| Low                                                                         | Control | 0.009       | 0.30  | 0.991            | 0.044       | 2.20  | 0.118            | 0.030       | 1.35  | 0.516            | -0.008      | -0.34 | 0.986            |
|                                                                             | High    | -0.002      | -0.05 | 1                | 0.036       | 2.42  | 0.070            | 0.054       | 3.36  | <b>0.004</b>     | 0.013       | 0.63  | 0.920            |
| High                                                                        | Control | 0.011       | 0.36  | 0.983            | 0.008       | 0.39  | 0.979            | -0.023      | -1.05 | 0.708            | -0.021      | -0.90 | 0.802            |
| Predation enhancement (day 13-15 post infection, infective parasites)       |         |             |       |                  |             |       |                  |             |       |                  |             |       |                  |
| comparison                                                                  |         | F0          |       |                  | F1          |       |                  | F2          |       |                  | F3          |       |                  |
|                                                                             |         | coefficient | t     | p                |
| Uninfected                                                                  | Control | -0.050      | -1.22 | 0.614            | 0.088       | 2.19  | 0.123            | 0.082       | 1.90  | 0.220            | 0.150       | 4.26  | <b>0.001</b>     |
|                                                                             | High    | -0.027      | -0.66 | 0.912            | 0.039       | 1.15  | 0.649            | 0.080       | 2.14  | 0.133            | 0.109       | 3.29  | <b>0.005</b>     |
|                                                                             | Low     | 0.017       | 0.41  | 0.977            | 0.075       | 2.16  | 0.130            | 0.146       | 3.87  | <b>0.001</b>     | 0.195       | 6.02  | <b>&lt;0.001</b> |
| Low                                                                         | Control | -0.067      | -1.84 | 0.254            | 0.013       | 0.42  | 0.975            | -0.064      | -2.11 | 0.142            | -0.046      | -1.58 | 0.386            |
|                                                                             | High    | -0.044      | -1.20 | 0.624            | -0.035      | -1.49 | 0.434            | -0.066      | -3.02 | <b>0.013</b>     | -0.087      | -3.28 | <b>0.005</b>     |
| High                                                                        | Control | -0.023      | -0.64 | 0.918            | 0.048       | 1.55  | 0.401            | 0.001       | 0.04  | 1                | 0.041       | 1.38  | 0.507            |

# Supplementary Figures

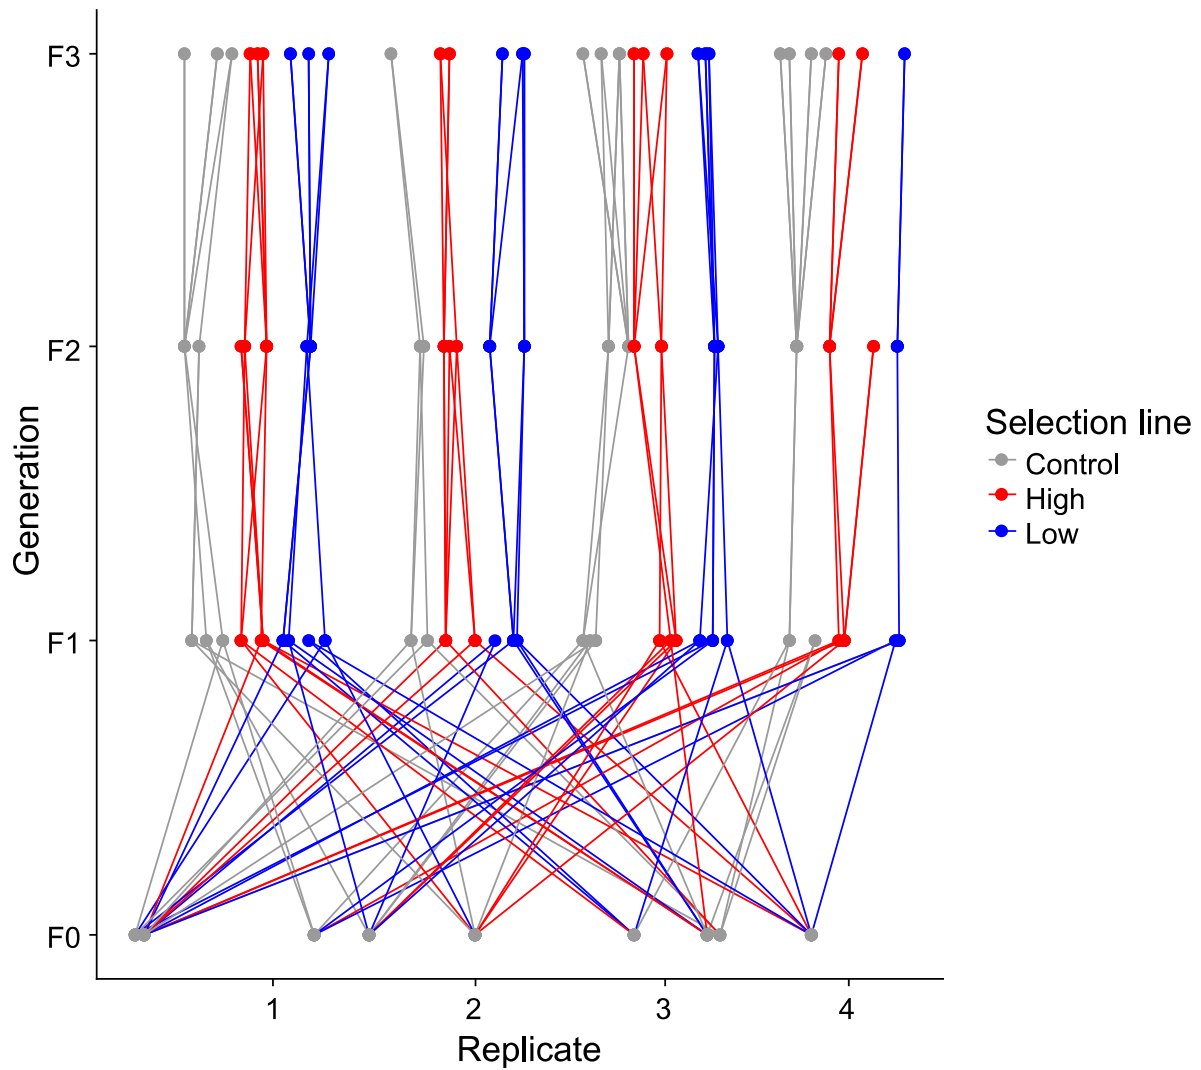

**Figure S1: Pedigree for parasite families in different selection lines.** Red: High, Blue: Low, Grey: Control (no selection). Each point represents a parasite family.

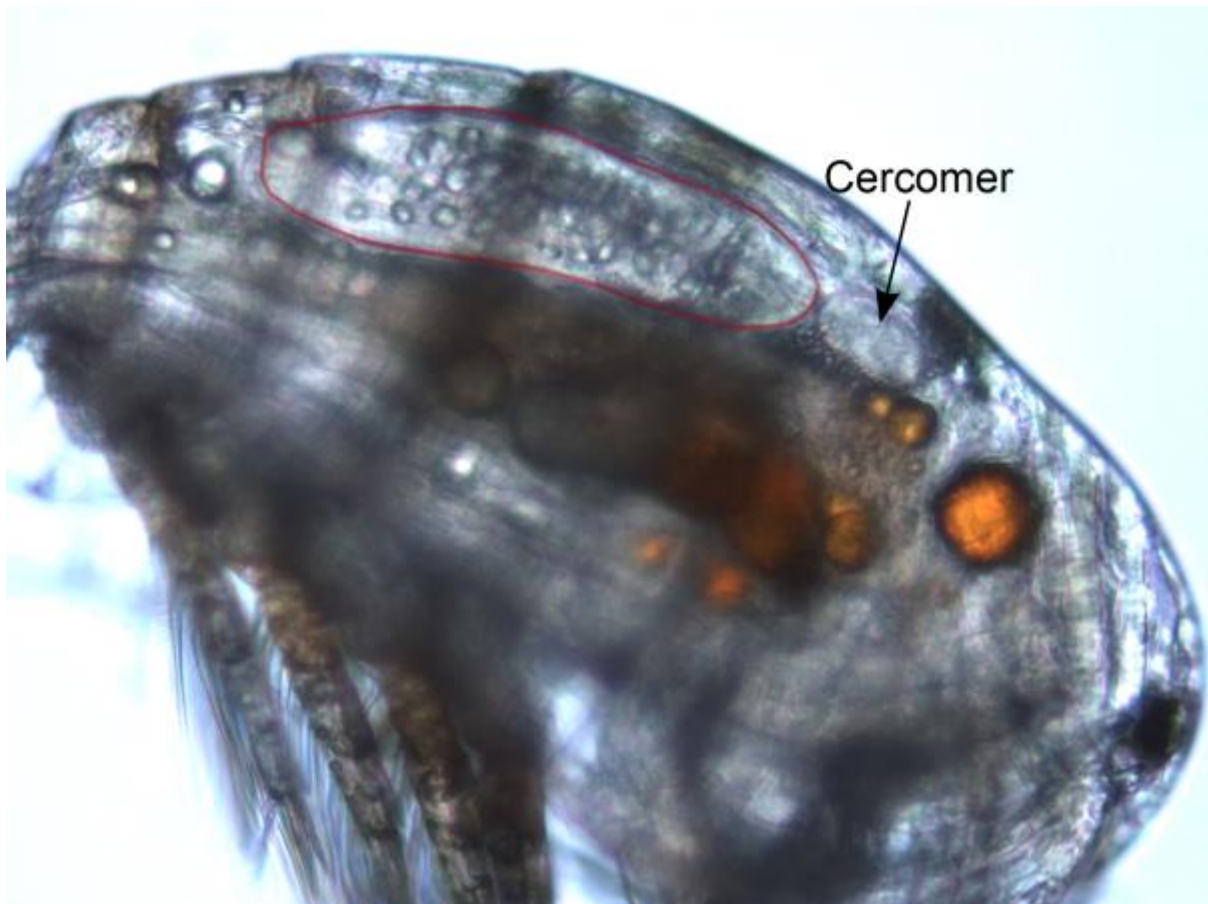

**Figure S2:** *Macrocyclus albidus* infected with *Schistocephalus solidus*. Red outline indicates area used to measure parasite size.

# Potential trade-offs with host manipulation

Selection line did not directly influence infection success in copepods ( $p=0.3634$ , Table S4-5), but its effect on infection success changed between generations ( $p=0.0476$ , Table S4-5). During the third generation, low selection line parasites were significantly better at infecting copepods than those from the control lines ( $p=0.043$ , Fig. S3A, Table S6), but not those from high selection lines ( $p=0.481$ , Fig. S3A, Table S6). Development was significantly affected by selection line ( $p=0.0369$ , Table S4-5), but a post hoc test revealed no clear differences between individual selection lines ( $p>0.1$ , Fig. S3B, Table S6). Neither size in copepods nor infection success, size, or fecundity in fish were affected by selection line or its interaction with generation ( $p>0.09$ , Table S4-5, Fig S3C-F).

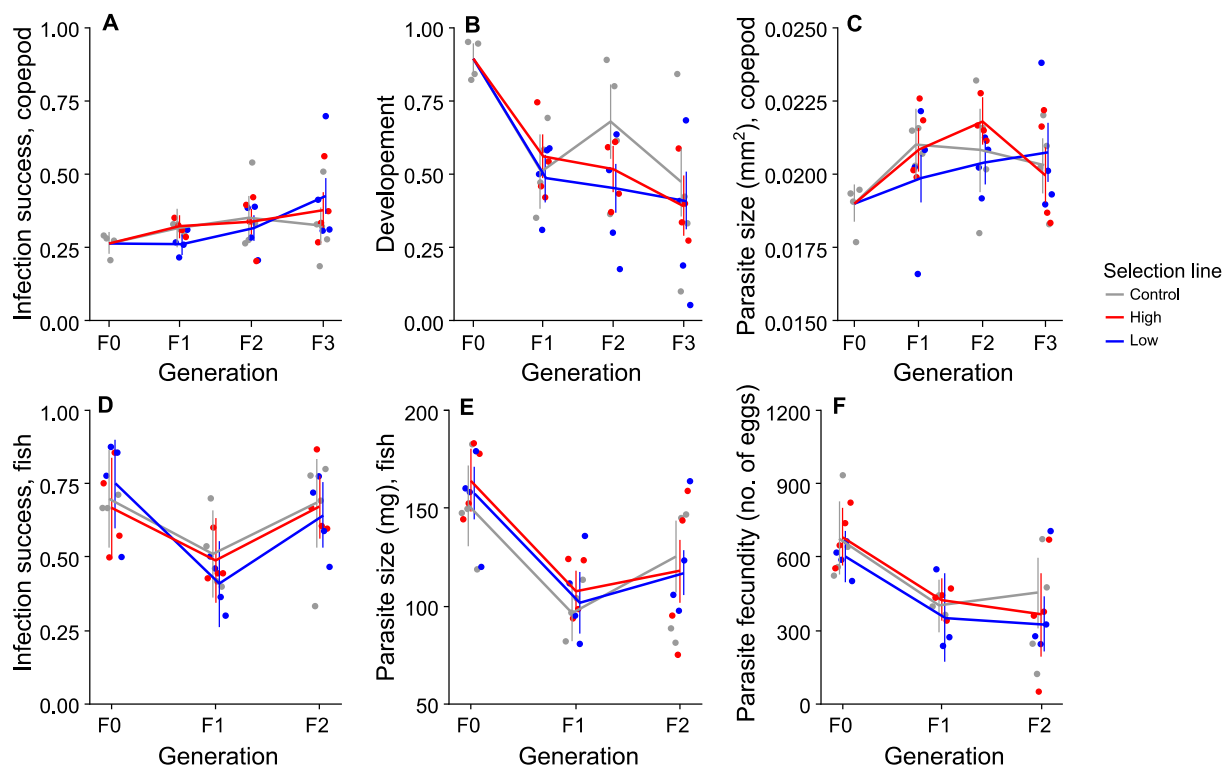

**Figure S3: Potential trade-offs with host manipulation.** A: Infection success in copepods, B: Development in copepods, C: Parasite size in copepods, D: Infection success in fish, E: Parasite size in fish, F: Parasite fecundity. Error bars represent 95% confidence intervals. N: Infection success, copepods: F0: 563, F1: Control: 199, High: 548, Low: 616, F2: Control: 154, High: 449, Low: 458, F3: Control: 217, High: 246, Low: 249; Development: F0: 142, F1: Control: 59, High: 169, Low: 147, F2: Control: 53, High: 151, Low: 142, F3: Control: 70, High: 88, Low: 100; Parasite size, copepods: F0: 126, F1: Control: 59, High: 151, Low: 138, F2: Control: 43, High: 131, Low: 120, F3: Control: 62, High: 87, Low: 94; Infection success, fish: F0: Control: 30, High: 30, Low: 32, F1: Control: 45, High: 47, Low: 44, F2: Control: 38, High: 76, Low: 73; Parasite size, fish: F0: Control: 21, High: 20, Low: 24, F1: Control: 19, High: 23, Low: 16, F2: Control: 26, High: 50, Low: 46; Parasite fertility, fish: F0: Control: 10, High: 10, Low: 12, F1: Control: 6, High: 10, Low: 6, F2: Control: 12, High: 10, Low: 10. Points indicate replicate populations.

**Table S4: General and generalized linear mixed models to analyse parasite traits which could reveal trade-offs with host manipulation.** Original model: response  $\sim 1+(1|population)$ . Significant p values are highlighted in bold.

| <b>Infection success, copepod (df: 2)</b> |     |          |                   |
|-------------------------------------------|-----|----------|-------------------|
| Factor                                    | df  | $\chi^2$ | p                 |
| + Generation                              | 3,1 | 24.79    | <b>&lt;0.0001</b> |
| + Selection line                          | 5,2 | 2.02     | 0.3634            |
| + Generation: Selection line              | 7,2 | 6.09     | <b>0.0476</b>     |
| <b>Development (df: 2)</b>                |     |          |                   |
| Factor                                    | df  | $\chi^2$ | p                 |
| + Generation                              | 3,1 | 70.93    | <b>&lt;0.0001</b> |
| + Selection line                          | 5,2 | 6.60     | <b>0.0369</b>     |
| + Generation: Selection line              | 7,2 | 1.15     | 0.5635            |
| <b>Parasite size, copepod (df: 3)</b>     |     |          |                   |
| Factor                                    | Df  | $\chi^2$ | p                 |
| + Generation                              | 4,1 | 4.70     | <b>0.0302</b>     |
| + Selection line                          | 6,2 | 4.72     | 0.0946            |
| + Generation: Selection line              | 8,2 | 1.06     | 0.5900            |
| <b>Infection success, fish (df: 2)</b>    |     |          |                   |
| Factor                                    | Df  | $\chi^2$ | p                 |
| + Generation                              | 3,1 | 0.02     | 0.8885            |
| + Selection line                          | 5,2 | 0.17     | 0.9206            |
| + Generation: Selection line              | 7,2 | 0.42     | 0.8111            |
| <b>Parasite size, fish (df: 3)</b>        |     |          |                   |
| Factor                                    | Df  | $\chi^2$ | p                 |
| + Time in fish                            | 4,1 | 72.30    | <b>&lt;0.0001</b> |
| + Generation                              | 5,1 | 1.04     | 0.3079            |
| + Selection line                          | 7,2 | 1.09     | 0.5804            |
| + Generation: Selection line              | 9,2 | 0.60     | 0.7423            |
| <b>Parasite fecundity (df: 3)</b>         |     |          |                   |
| Factor                                    | Df  | $\chi^2$ | p                 |
| + Time in fish                            | 4,1 | 34.64    | <b>&lt;0.0001</b> |
| + Generation                              | 5,1 | 4.53     | <b>0.0333</b>     |
| + Selection line                          | 7,2 | 1.87     | 0.3916            |
| + Generation: Selection line              | 9,2 | 0.34     | 0.8454            |

**Table S5: Summary of the model containing all fixed effects and significant interactions (see table S4).** Comparisons are with parasites from the control line.

| Traits in copepods                |                   |        |                  |        |                  |        |
|-----------------------------------|-------------------|--------|------------------|--------|------------------|--------|
|                                   | Infection success |        | Development      |        | Parasite size    |        |
| Random effects                    |                   |        |                  |        |                  |        |
| Factor                            | Variance ± SD     |        | Variance ± SD    |        | Variance ± SD    |        |
| Replicate (intercept)             | 0.0288 ± 0.1697   |        | 0.1708 ± 0.4133  |        | 0.1952 ± 0.4418  |        |
| Residual                          |                   |        |                  |        | 23.5268 ± 4.8504 |        |
| Fixed effects                     |                   |        |                  |        |                  |        |
| Factor                            | Estimate ± SE     | z      | Estimate ± SE    | z      | Estimate ± SE    | t      |
| Intercept                         | -0.8944 ± 0.1578  | -5.670 | 1.3442 ± 0.2783  | 4.830  | 21.131 ± 0.4700  | 44.963 |
| Selection line (High)             | -0.0736 ± 0.1739  | -0.423 | -0.2366 ± 0.1732 | -1.366 | 0.5736 ± 0.4120  | 1.392  |
| Selection line (Low)              | -0.4092 ± 0.1758  | -2.327 | -0.4389 ± 0.1741 | -2.521 | -0.1499 ± 0.4149 | -0.361 |
| Generation                        | 0.0737 ± 0.0685   | 1.076  | -0.5577 ± 0.0689 | -8.090 | 0.3361 ± 0.1574  | 2.135  |
| Generation: Selection line (High) | 0.0838 ± 0.0920   | 0.911  |                  |        |                  |        |
| Generation: Selection line (Low)  | 0.2238 ± 0.0927   | 2.414  |                  |        |                  |        |
| Traits in fish                    |                   |        |                  |        |                  |        |
|                                   | Infection success |        | Fecundity        |        | Parasite size    |        |
| Random effects                    |                   |        |                  |        |                  |        |
| Factor                            | Variance ± SD     |        | Variance ± SD    |        | Variance ± SD    |        |
| Replicate (intercept)             | 0.0408 ± 0.2019   |        | 126.8 ± 11.3     |        | 2739 ± 52        |        |
| Residual                          |                   |        | 1514.5 ± 38.9    |        | 35915 ± 190      |        |
| Fixed effects                     |                   |        |                  |        |                  |        |
| Factor                            | Estimate ± SE     | z      | Estimate ± SE    | t      | Estimate ± SE    | t      |
| Intercept                         | 0.4644 ± 0.2384   | 1.948  | -95.260 ± 34.610 | -2.752 | -373.01 ± 319.16 | -1.169 |
| Selection line (High)             | -0.0271 ± 0.2573  | -0.105 | 5.6064 ± 6.3404  | 0.884  | -17.992 ± 50.087 | -0.359 |
| Selection line (Low)              | -0.0982 ± 0.2578  | -0.381 | 6.5451 ± 6.4431  | 1.016  | -64.677 ± 51.147 | -1.265 |
| Generation                        | 0.0219 ± 0.1291   | 0.170  | -4.2804 ± 3.5232 | -1.215 | -69.463 ± 29.947 | -2.320 |
| Time in fish                      |                   |        | 2.2727 ± 0.3216  | 7.067  | 10.355 ± 2.745   | 3.772  |

**Table S6: Post hoc tests for potential trade-offs with host manipulation.** Significant p values are highlighted in bold.

| Infection success, copepod |         |             |       |       |             |       |       |             |       |              |             |       |              |
|----------------------------|---------|-------------|-------|-------|-------------|-------|-------|-------------|-------|--------------|-------------|-------|--------------|
| Comparison                 |         | F0          |       |       | F1          |       |       | F2          |       |              | F3          |       |              |
|                            |         | coefficient | t     | p     | coefficient | t     | p     | coefficient | t     | p            | coefficient | t     | p            |
| High                       | Control | -0.089      | -0.38 | 0.923 | 0.019       | 0.11  | 0.994 | -0.060      | -0.30 | 0.950        | 0.261       | 1.30  | 0.398        |
| Low                        |         | -0.145      | -0.62 | 0.811 | -0.271      | -1.52 | 0.278 | -0.168      | -0.84 | 0.673        | 0.479       | 2.40  | <b>0.043</b> |
|                            | High    | -0.056      | -0.24 | 0.970 | -0.291      | -2.23 | 0.065 | -0.108      | -0.75 | 0.729        | 0.218       | 1.15  | 0.481        |
| Development                |         |             |       |       |             |       |       |             |       |              |             |       |              |
| Comparison                 |         | F0          |       |       | F1          |       |       | F2          |       |              | F3          |       |              |
|                            |         | coefficient | t     | p     | coefficient | t     | p     | coefficient | t     | P            | coefficient | t     | P            |
| High                       | Control | 0.870       | 1.29  | 0.397 | 0.218       | 0.71  | 0.752 | -0.758      | -2.16 | 0.076        | -0.224      | -0.65 | 0.790        |
| Low                        |         | 1.106       | 1.54  | 0.273 | -0.098      | -0.32 | 0.946 | -1.071      | -3.02 | <b>0.007</b> | -0.284      | -0.86 | 0.663        |
|                            | High    | 0.236       | 0.30  | 0.952 | -0.317      | -1.38 | 0.346 | -0.313      | -1.29 | 0.395        | -0.060      | -0.19 | 0.980        |
